1 ***Kelch13* and *MDR1* Polymorphisms, and Drug Effectiveness at Day 3 after**  
2 **Dihydroartemisinin-Piperaquine Treatment for *Plasmodium falciparum* Malaria**  
3 **on Bioko Island, Equatorial Guinea: 2014-2017**

4 Yu-Zhong Zheng<sup>1#</sup>, Jiang-Tao Chen<sup>2#</sup>, Xue-Yan Liang<sup>1,3</sup>, Carlos Salas Ehapo<sup>4</sup>, Urbano  
5 Monsuy Eyi<sup>4</sup>, Hui-Ying Huang<sup>1,3</sup>, Wei-Zhong Chen<sup>3</sup>, Li-Yun Lin<sup>1</sup>, Dong-De Xie<sup>2</sup>,  
6 Yu-Ling Wang<sup>2</sup>, Guo-Wei Chen<sup>2</sup>, Xiang-Zhi Liu<sup>3</sup>, Guang-Cai Zha<sup>1</sup>, Huan-Tong Mo<sup>3</sup>,  
7 Xin-Yao Chen<sup>3</sup>, Jian Li<sup>5</sup>, Ting-Ting Jiang<sup>5</sup>, Min Lin<sup>1</sup>

8 <sup>1</sup>School of Food Engineering and Biotechnology, Hanshan Normal University,  
9 Chaozhou, Guangdong Province, People's Republic of China;

10 <sup>2</sup>The Chinese Medical Aid Team to the Republic of Equatorial Guinea, Guangzhou,  
11 Guangdong Province, People's Republic of China; Department of Medical Laboratory,  
12 Huizhou Central Hospital, Huizhou, Guangdong Province, People's Republic of  
13 China;

14 <sup>3</sup>Department of Medical Laboratory, Chaozhou People's Hospital Affiliated to  
15 Shantou University Medical College, Chaozhou, Guangdong Province, People's  
16 Republic of China;

17 <sup>4</sup>Department of Medical Laboratory, Malabo Regional Hospital, Malabo, Equatorial  
18 Guinea;

19 <sup>5</sup>Department of Human Parasitology, School of Basic Medical Sciences; Department  
20 of Infectious Diseases, Renmin Hospital, Hubei University of Medicine, Shiyan,  
21 People's Republic of China

22 <sup>#</sup>These authors contributed equally to this work.

23 E-mail address: konfutea@hotmail.com

24

25 **ABSTRACT**

26 Artemisinin (ART) combination therapies were introduced on malaria endemic Bioko  
27 Island in 2004 through Bioko Island Malaria Control Project. Recently, ART-resistant  
28 *Plasmodium falciparum* strain with *Kelch13* (K13) propeller M579I mutation  
29 originating from Equatorial Guinea was observed as an increased parasite clearance  
30 time on day 3 after dihydroartemisinin-Piperaquine (DHA-PIP) treatment (D3  
31 positivity). Here, we surveyed DHA-PIP effectiveness and molecular markers of drug  
32 resistance at D3 after DHA-PIP treatment on Bioko Island from 2014 to 2017. Among  
33 the 371 uncomplicated *P. falciparum* patients, 86.3% (320/471) were successfully  
34 followed up at D3. 5.9% (19/320) of patients showed D3 positivity. K13 and MDR1  
35 gene were successfully sequenced from 46 patients collected at D0 (baseline  
36 population) and 19 D3-positivity patients. Five non-synonymous K13 mutations  
37 (H136N; K189N; K248N; K326E; K332N) were found. There was no statistical  
38 difference in the frequency of these K13 mutations between baseline population and  
39 D3-positivity samples ( $p>0.05$ ). Additionally, none of the K13 propeller  
40 polymorphisms known to be involved in ART-resistance in Asia or Africa were  
41 detected. For MDR1 gene, 38.5% (25/65) carried N86Y mutation; 73.8% (48/65) the  
42 Y184F mutation. Parasites surviving DHA-PIP at D3 post-treatment were  
43 significantly more likely than the baseline population to carry the N86Y ( $p < 0.05$ ).  
44 These results suggest that K13 is not the best predictive molecular marker for ART  
45 resistance in Africa. More isolates from cases with delayed parasite clearance after  
46 DHA-PIP treatment indicated that *in vitro* and *in vivo* monitoring for ART derivatives  
47 and ACT partner drugs should be regularly performed on Bioko Island, Equatorial  
48 Guinea.

49 **KEYWORDS:** Dihydroartemisinin-Piperaquine(DHA-PIP), *Plasmodium falciparum*,  
50 Bioko Island, drug resistance

## 51 INTRODUCTION

52 Malaria is one of the most important tropical parasitic diseases with an estimated  
53 219 million cases and 435,000 deaths in 2017 (1). The emergence of *Plasmodium*  
54 *falciparum* resistance to anti-malarial drugs has been threatening the world's malaria  
55 control and elimination efforts (2,3). Currently, World Health Organization (WHO)  
56 recommends artemisinin (ART) combination therapies (ACTs) as first-line treatment  
57 for uncomplicated *P. falciparum* malaria many endemic countries worldwide, and  
58 shown to have greatly contributed to the reduction in malaria morbidity and mortality  
59 (4). In Recent years, strong evidences supported that malaria parasites resistant to  
60 ARTs have emerged and are spreading in certain parts of Southeast Asia, and raises  
61 concerns that resistance may emerge and become widespread in high-burden settings,  
62 such as Africa (5,6). Untill now, the efficacy of ACTs remains high in Africa.  
63 However, evidence based on classical microscopic parasite detection suggests that a  
64 proportion of ACT-treated children in Kenya do not completely clear *P. falciparum*  
65 parasitemia (7). Additionally, recently Lu et al. observed (2017) an ART-resistant *P.*  
66 *falciparum* strain originating from Equatorial Guinea, Africa (6).

67 Characterization of ART-resistant parasite is primarily discriminated by nucleotide  
68 polymorphisms in the propeller domain of the *P. falciparum* kelch13 gene (K13,  
69 *Pf3D7\_1343700*) (8). In Southeast Asia, K13 propeller polymorphism, such as Y493H,  
70 R539T, I543T and C580Y, is considered a reliable molecular marker for ART-resistant  
71 parasites, which showed increased survival rates in ring-stage survival assays (RSAs)  
72 and delayed parasite clearance in ACT-treated patients (5,8,9). Parasite clearance can  
73 be quantified either by the detection of parasites in patients on day 3 (i.e., “D3  
74 positivity”) (10). The proportion of patients who are still parasitaemic on D3 after  
75 treatment with artesunate or ACT is currently an indicator for routine monitoring to  
76 identify suspected ART resistance (10).

77 Bioko Island, Equatorial Guinea, with historically high malaria transmission, has  
78 been subject to extensive interventions including intensive vector control, improved  
79 case management, intermittent preventative treatments (IPT) and behavioural change  
80 interventions since 2004 through the Bioko Island Malaria Control Project (BIMCP)

81 (11). Through BIMCP, including the introduction of indoor residual spraying (IRS)  
82 and distribution of insecticide-treated nets (ITNs) to all households on Bioko Island,  
83 first-line artemisinin containing antimalarials (ACAs) free of charge, the parasite  
84 prevalence reduced from 43.3 to 10.5% between 2004 and 2016 (11). ACAs used in  
85 Equatorial Guinea have included artesunate plus sulfadoxine-pyrimethamine,  
86 artesunate plus amodiaquine and dihydroartemisinin-piperaquine (DHA-PIP) (12).  
87 Although ACAs are available and free, many people still sought their medicines at a  
88 private pharmacy rather than received treatment from the public health services (12).  
89 Additionally, falsified ACAs have been reported on Bioko Island, with the prevalence  
90 ranging between 6.1% and 16.1%, depending on the sampling method used (12). All  
91 of this increased the risk of ART-resistance in the region.

92 Our previous study showed that the absence of mutations in the propeller region of  
93 K13 in parasites from Bioko Island during 2013-2014 (13). The objectives of this  
94 study were to investigate the *K13* and *MDR1* polymorphisms, and drug effectiveness  
95 at Day 3 after DHA-PIP Treatment for *P. falciparum* Malaria on Bioko Island from  
96 2014 to 2017.

97

## 98 **RESULTS**

### 99 **General characters**

100 From January 2014 to December 2017, we enrolled 471 patients with *P. falciparum*  
101 uncomplicated malaria from Bioko, Equatorial Guinea. The median (interquartile  
102 range [IQR]) age of patients was 26 years (18 to 38.5), and 36.9% of them were  
103 women. The median (IQR) parasite density was 3300 parasites/ $\mu$ l (1840 to 7000).  
104 Among the 471 enrolled patients, 86.3% (320/471) were successfully followed up on  
105 D3. The median (IQR) age of these patients was 26 years (17 to 37), and 40.0% of  
106 them were women. The median (IQR) parasite density was 3400 parasites/ $\mu$ l (1810 to  
107 7940).

108 Among the 320 patients evaluated on D3, 5.9% (19/320) showed D3 positivity by  
109 microscopy, which was also confirmed and identified the *Plasmodium* species by  
110 PCR-HRM (14,15). These 19 patients had D0 and D3 parasite densities of 900 to  
111 8000 and 40 to 2120 parasites/ $\mu$ l, respectively.

### 112 **Analysis of *K13* propeller gene**

113 *K13* propeller gene was successfully amplified and sequenced from 65 patients  
114 including baseline population (46 patients randomly selected from the 301 patients  
115 without ART-resistance, collected at D0) and 19 D3-positivity patients. Five  
116 non-synonymous mutations (H136N, CAT>AAT; K189N, AAG>AAC; K248N,  
117 AAG>AAT; K326E, AAA>GAA and K332N, AAA>AAC) were detected from the  
118 two groups (Table 1). However, none of the polymorphisms known to be involved in  
119 ART-resistance in Asia (8) or Africa (M579I) (6) were detected. There was no  
120 statistical difference in the frequency of these non-synonymous mutations between  
121 baseline population and D3 samples ( $p>0.05$ ).

122 The *K* value for the whole gene of the 65 samples was 0.763. The highest  
123 nucleotide differences was found in the *Plasmodium*-specific region (codons 1-440)  
124 ( $K=0.732$ ) while the lowest was found in the propeller domain (codons 441-726)  
125 ( $K=0.030$ ). The overall haplotype diversity ( $H_d$ ) and nucleotide diversity ( $\pi$ ) in this  
126 gene were estimated to be  $0.631\pm 0.037$  and 0.00039, respectively. Tajima's *D* test, Fu  
127 and Li's tests were also performed to analyze the natural selection in the Bioko *P.*

128 *falciparum* K13 gene. The evidence of selection occurring on the K13 gene was not  
129 very conclusive as Tajima's D was negative (-1.590,  $p > 0.05$ ), but the Fu & Li's D&F  
130 was positive (D: -3.546,  $p < 0.05$ ; F -3.415,  $p < 0.05$ ) for the whole gene.

### 131 **Analysis of *MDR1* gene**

132 All samples was successfully amplified and sequenced for MDR1 codons 86, 184,  
133 1034, 1042, and 1246. Of the 65 samples, 38.5% (25/65) carried N86Y (AAC>TAT)  
134 mutation; 73.8% (48/65) the Y184F (TAT>TTT) mutation. No mutation was found at  
135 1034, 1042 and 1246. As shown in Table 1, the proportion of patients carrying the  
136 mutation N86Y and Y184F in the baseline population was higher than that on D3.  
137 However, there was only a statistical difference in the proportion of N86Y mutation  
138 between the baseline population and D3-positive samples ( $p < 0.05$ ).

139

## 140 **DISCUSSION**

141 There is a perennially high rate of malaria transmission throughout Equatorial  
142 Guinea, and DHA-PIP is currently commonly used for treatment. To the best of our  
143 knowledge, this is the first report to evaluate the effectiveness of routine DHA-PIP  
144 treatment for uncomplicated malaria, and described the drug-resistance genetic  
145 polymorphisms in D3-positivity *P. falciparum* isolates after DHA-PIP treatment in  
146 Equatorial Guinea. Our results showed that DHA-PIP drugs were efficacious in  
147 treating uncomplicated *P. falciparum* malaria in the region. This high cure rate of  
148 DHA-PIP for Bioko *P. falciparum* supports earlier findings from and across Africa  
149 (16-21). This ACT medicine is being increasingly recommended in malaria endemic  
150 countries as second-line treatment for *falciparum* malaria and also used for mass drug  
151 administration in special situations (21). However, it was found 5.9% (19/320)  
152 patients with D3 positivity, suggesting the possibility that a subset of parasites is  
153 becoming less susceptible to ART through mutation in some gene, that some  
154 individuals have relatively poor parasite-clearing immune responses, or that some  
155 patients were not self-administering their remaining doses of DHA-PIP. Based on  
156 these results, intensive surveillance of ART derivatives and ACT partner drugs must  
157 be conducted regularly on Bioko Island.

158 Due to the condition limitation, this study was not determining the *in vitro*  
159 susceptibility to ART derivatives using the ring survival test. Indeed, clinical  
160 resistance to ART is manifested by an increase in the ring-stage survival rate after  
161 contact with ART (5,8,9). In Southeast Asia, an increase in the ring-stage survival rate  
162 was also associated with the detection of K13 mutations including F446I, N458Y,  
163 Y493H, R539T, I543T, R561H and C580Y (5,8,9). In the present study, lower  
164 nucleotide differences ( $K=0.030$ ) in the propeller domain of K13 gene were observed  
165 in the Bioko *P. falciparum* parasites collected during 2014 to 2017. No patients  
166 carried the mutations associated with ART-resistance in Asia (8). Notably, the K13  
167 propeller mutation (M579I) associated with ART-resistance originating from  
168 Equatorial Guinea (6) was not observed on Bioko Island. These results are consistent  
169 with our previous study on the island in 2012-2014 (13), which revealed a limited

170 number of genetic polymorphisms in the K13-propeller region. In addition, Bioko had  
171 the higher prevalence of isolates with mutant codons in the *Plasmodium*-specific  
172 region (46.2%, 30/65). The most frequently mutation was one non-synonymous  
173 mutation at proximal end (upstream region) K189N (83.3%, 25/30). Although the  
174 K189N mutation was observed at a comparatively higher frequency in the parasitic  
175 isolates, no correlation with clinical phenotype was observed among them (OR: 1.06,  
176 95% CI 0.35-3.20,  $p=0.863$ ) (Table 1). Previous study (22,23) revealed that the  
177 infections carried K189T/N had a median  $PC_{1/2}$  of 2.1 h (range 0.8-7.1) similar to that  
178 of infections with wild type parasites; 2.2 h (range 0.7-6.3). In Africa, significantly  
179 prolonged clearance has not yet been observed and the presently restricted variation in  
180 parasite clearance cannot be explained by K13 polymorphisms (23). All of these  
181 suggest that SNPs at K13 is not the best predictive molecular marker for  
182 ART-resistance among African patients. More isolates from cases of clinical failure or  
183 with delayed parasite clearance after treatment with ART derivatives are necessary to  
184 identify new molecular markers.

185 In our study, the frequency of N86Y mutation was significant higher in the patients  
186 prior to treatment (D0) than that on D3-positive patients ( $p<0.05$ ). According to  
187 previous reports (24,25), the parasites containing the MDR1 86Y allele showed  
188 significantly higher piperazine IC50s compared with those containing the MDR1  
189 N86 allele. Multivariate analysis also revealed that MDR1 86Y allele was an  
190 associated factor of reduced piperazine sensitivity. The important role of mutations  
191 in the MDR1 gene on *in vitro* piperazine sensitivity has been confirmed by a recent  
192 study using genetically modified *P. falciparum* lines (26). Since the implementation of  
193 fixed-dose ACT through BIMCP, DHA-PIP would be started on Bioko Island;  
194 parasites with reduced piperazine sensitivity might be selected in such areas. Thus,  
195 *in vitro* and *in vivo* monitoring should be regularly performed in the region.

196 In conclusion, these results suggest that K13 is not the best predictive molecular  
197 marker for ART-resistance in Africa. Although DHA-PIP remains efficacious in the  
198 study region and those ART-resistance mutations are not found, ACT may pose  
199 positive selection on the parasites. In additionally, the rate of transmission and the



200 diversity of vector species on Bioko Island may also increase selection pressure on  
201 parasite strains (14). More isolates from cases with delayed parasite clearance after  
202 DHA-PIP treatment indicated that *in vitro* and *in vivo* monitoring for ART derivatives  
203 and ACT partner drugs should be regularly performed on Bioko Island, Equatorial  
204 Guinea.  
205

206 **MATERIALS AND METHODS**

207 **Study area.** The study was carried out in the Malabo Regional Hospital and the  
208 clinic of the Chinese medical aid team to the Republic of Equatorial Guinea on Bioko  
209 Island. Ethical approval was obtained from the Ethics Committee of Malabo Regional  
210 Hospital. Bioko is an island 32 km off the west coast of Africa, and the northernmost  
211 part of Equatorial Guinea. It's population, of approximately 334, 463 (2015 census, of  
212 which approximately 90% live in Malabo, the capital city) are at risk of malaria  
213 year-round (14). Before the launch of the BIMCP in 2004, entomological inoculation  
214 rates (EIR) on the island were in excess of 750 infectious bites per person per year  
215 (14).

216 ***Plasmodium falciparum* isolates.** A total of 471 patients with uncomplicated  
217 malaria were collected and analysed between January 2014 and December 2017.  
218 Included patients were aged between 12 and 67 years, were residents on Bioko Island.  
219 Malaria patients were classified into uncomplicated malaria states according to the  
220 WHO criteria, which were defined as positive smear for *P. falciparum* and presence of  
221 fever ( $\geq 37.5^{\circ}\text{C}$ ) (27). Consent was obtained from all participating subjects or their  
222 parents. Laboratory screening for malaria was done using an Immunochromatographic  
223 Diagnostic Test (ICT Malaria Combo Cassette Test) and confirmed using microscopic  
224 examination of blood smears (13,14). Extra blood drops were collected for a malaria  
225 smear and onto Whatman 903® filter paper (GE Healthcare, Pittsburgh, USA). The  
226 *Plasmodium* species were identified by a real-time PCR followed by high-resolution  
227 melting (PCR-HRM) as our previous reports (14,15). Patients positive for *P.*  
228 *falciparum* were treated with DHA-PIP according to the national treatment guidelines.  
229 The first dose was taken under the supervision of and observed by the pharmacy  
230 owner, who also provided the patients with clear explanation for consumption of the  
231 remaining two doses at home. All patients were asked again to confirm completion of  
232 DHA-PIP doses when they returned on D3 for clinical and parasitological follow-up.

233 **PCR amplification of K1 and MDR1 gene.** Genomic DNA was extracted from  
234 dried filter bloodspots (DBS) with Genomic DNA Extraction Kit for Dry Blood Spot  
235 [(No. DP334) TIANGENE Biotech (Beijing) CO., Ltd], and following the

236 manufacturer's protocol.

237 We developed a new PCR method to amplify the entire K13 gene (Pf3D7\_1343700)  
238 (Fig. 1A). The primary PCR primers (K13\_PCR\_F and K13\_PCR\_R) amplified the  
239 expected 2,097 bp product under the following conditions: 95°C for 3 min; 30 cycles  
240 of 98°C for 10 s, 58°C for 10s, 72°C for 2 min; and final extension at 72°C for 10 min;  
241 The nested PCR primers (K13\_N1\_F and K13\_N2\_R) amplified the expected  
242 2,027bp product under the following conditions: 95°C for 3 min; 35 cycles of 98°C  
243 for 10 s, 55°C for 5s, 72°C for 2 min; and final extension at 72°C for 10 min. TaKaRa  
244 Taq™ HS Perfect Mix (TaKaRa, Carlsbad, CA) was used as the master mix and was  
245 supplemented with a 0.2 µM concentration of each primer. Final volumes for primary  
246 and nested PCRs were 25 µl (12.5 µl master mix plus 1 µl DNA template) and 50 µl  
247 (25 master mix plus 1 µl primary PCR product), respectively.

248 In order to capture MDR1 SNPs at codons 86, 130, 184, 1034, 1042, 1109, and 1246,  
249 a nest PCR were performed to amplify 2 shorter fragments (Fig. 1B) as our previous  
250 reports (28,29).

251 **Sequence polymorphism analysis.** All PCR products were analyzed using 1.0%  
252 agar gel electrophoresis and DNA sequencing using an ABI 3730XL automated  
253 sequencer (PE Biosystems, CT, USA). The nucleotide and deduced amino acid  
254 sequences of K13 and MDR1 were analysed using EditSeq and SeqMan in the  
255 DNASTAR package (DNASTAR, Madison, WI, USA). The K13 and MDR1  
256 sequences of the laboratory-adapted *P. falciparum* strain 3D7 (XM\_001351086) was  
257 included in the alignment for comparison as a reference sequence. In K13 gene, the  
258 values of segregating sites (S), the average number of pair-wise nucleotide differences  
259 (K), haplotype diversity (Hd), and nucleotide diversity ( $\pi$ ) were calculated using  
260 DnaSP version 5.10.00. The  $\pi$  was also calculated on a sliding window plot of 10  
261 bases with a step size of 5 bp in order to estimate the stepwise diversity across the  
262 sequences. Tajima's D test, Fu and Li's D and F statistics analysis were performed  
263 using DnaSP package ver. 5.10.00 in order to evaluate the neutral theory of natural  
264 selection. The recombination parameter (R), which included the effective population  
265 size and probability of recombination between adjacent nucleotides per generation,

266 and the minimum number of recombination events ( $R_m$ ) were analysed using DnaSP  
267 version 5.10.00. The frequency data was analyzed using SPSS 17.0 (SPSS Inc.,  
268 Chicago, IL). The  $p$ -value < 0.05 was considered statistically significant.  
269

270 **Contributions**

271 ML, JTC and YZZ designed the study. CSE, UME, DDX, YLW, GWC collected the  
272 samples, entered the data and validated microscopy. XYL, HYH and YZZ analyzed  
273 and interpreted the data. XZL, GCZ, HTM, XYC, JL, TTJ, WZC and LYL conducted  
274 the laboratory work (*P. falciparum* PCR and analysis of molecular markers). ML and  
275 YZZ wrote the paper. All authors critically reviewed the paper and approved the final  
276 version of the paper for submission.

277 **Declaration of Interest**

278 The Authors report no conflicts of interest.

279 **Acknowledgments**

280 The authors thank the Department of Health of Guangdong Province and Department  
281 of Aid to Foreign Countries of Ministry of Commerce of People's Republic of China  
282 for their help. The authors also thank Santiago-m Monte-Nguba for his technical  
283 help during the samples collection and diagnosis. This work was partially supported  
284 by Natural Science Foundation of Guangdong Province (Grant No. 2016A03031311  
285 to Jiang-Tao Chen; 2018A030307074 to Yu-Zhong Zheng) and Guangdong Science  
286 and Technology Project (Grant No. 2016A030303064 to Guang-Cai Zha).

287

288

289 **Reference**

- 290 1. World Health Organization. 2018. World malaria report 2018. World Health  
291 Organization. <https://www.who.int/malaria/publications/world-malaria-report-2018/report/en/>.
- 292
- 293 2. Ngassa Mbenda HG, Das A. 2016. Analysis of genetic diversity in the  
294 chloroquine-resistant gene Pfcrt in field *Plasmodium falciparum* isolates from  
295 five regions of the southern Cameroon. Infect Genet Evol 44:450–458.  
296 <https://doi.org/10.1016/j.meegid.2016.07.003>.
- 297 3. Madamet M, Kounta MB, Wade KA, Lo G, Diawara S, Fall M, Bercion R,  
298 Nakoulima A, Fall KB, Benoit N, Gueye MW, Fall B, Diatta B, Pradines B. 2017.  
299 Absence of association between polymorphisms in the K13 gene and the presence  
300 of *Plasmodium falciparum* parasites at day 3 after treatment with artemisinin  
301 derivatives in Senegal. Int J Antimicrob Agents 49:754–756.  
302 <https://doi.org/10.1016/j.ijantimicag.2017.01.032>.
- 303 4. Whegang Youdom S, Chiabi A, Basco LK. 2019. Monitoring the Efficacy and  
304 Safety of Artemisinin-Based Combination Therapies: A Review and Network  
305 Meta-analysis of Antimalarial Therapeutic Efficacy Trials in Cameroon. Drugs R  
306 D 19:1–14. <https://link.springer.com/article/10.1007%2Fs40268-018-0259-3>.
- 307 5. von Seidlein L, Peto TJ, Landier J, Nguyen TN, Tripura R, Phommason K,  
308 Pongvongsa T, Lwin KM, Keereecharoen L, Kajeechiwa L, Thwin MM, Parker  
309 DM, Wiladphaingern J, Nosten S, Proux S, Corbel V, Tuong-Vy N, Phuc-Nhi TL,  
310 Son DH, Huong-Thu PN, Tuyen NTK, Tien NT, Dong LT, Hue DV, Quang HH,  
311 Nguon C, Davoeung C, Rekol H, Adhikari B, Henriques G, Phongmany P,  
312 Suangkanarat P, Jeeyapant A, Vihokhern B, van der Pluijm RW, Lubell Y, White  
313 LJ, Aguas R, Promnarate C, Sirithiranont P, Malleret B, Rénia L, Onsjö C, Chan  
314 XH, Chalk J, Miotto O, Patumrat K, Chotivanich K, Hanboonkunupakarn B,  
315 Jittmala P, Kaehler N, Cheah PY, Pell C, Dhorda M, Imwong M, Snounou G,  
316 Mukaka M, Peerawaranun P, Lee SJ, Simpson JA, Pukrittayakamee S,  
317 Singhasivanon P, Grobusch MP, Cobelens F, Smithuis F, Newton PN, Thwaites  
318 GE, Day NPJ, Mayxay M, Hien TT, Nosten FH, Dondorp AM, White NJ. 2014.  
319 Spread of artemisinin resistance in *Plasmodium falciparum* malaria. N Engl J  
320 Med 371:411–423. <https://www.nejm.org/doi/10.1056/NEJMoa1314981>.
- 321 6. Lu F, Culleton R, Zhang M, Ramaprasad A, von Seidlein L, Zhou H, Zhu G, Tang  
322 J1, Liu Y, Wang W, Cao Y, Xu S, Gu Y, Li J, Zhang C, Gao Q, Menard D, Pain A,

- 323 Yang H, Zhang Q, Cao J. 2017. Emergence of Indigenous Artemisinin-Resistant  
324 *Plasmodium falciparum* in Africa. *N Engl J Med* 376:991–993.  
325 <https://www.nejm.org/doi/10.1056/NEJMc1612765>.
- 326 7. Borrmann S, Sasi P, Mwai L, Bashraheil M, Abdallah A, Muriithi S, Frühauf H,  
327 Schaub B, Pfeil J, Peshu J, Hanpithakpong W, Rippert A, Juma E, Tsofa B,  
328 Mosobo M, Lowe B, Osier F, Fegan G, Lindegårdh N, Nzila A, Peshu N,  
329 Mackinnon M, Marsh K. 2011. Declining responsiveness of *Plasmodium*  
330 *falciparum* infections to artemisinin-based combination treatments on the Kenyan  
331 coast. *PLoS One* 6:e26005. <https://doi.org/10.1371/journal.pone.0026005>.
- 332 8. Ménard D, Khim N, Beghain J, Adegnika AA, Shafiul-Alam M, et al. 2016. A  
333 Worldwide Map of *Plasmodium falciparum* K13-Propeller Polymorphisms. *N*  
334 *Engl J Med* 374:2453–2464. <https://www.nejm.org/doi/10.1056/NEJMoa1513137>.
- 335 9. Montenegro M, Neal AT, Posada M, De Las Salas B, Lopera-Mesa TM, Fairhurst  
336 RM, Tobon-Castaño A. 2017. Propeller Alleles, *mdr1* Polymorphism, and Drug  
337 Effectiveness at Day 3 after Artemether-Lumefantrine Treatment for *Plasmodium*  
338 *falciparum* Malaria in Colombia, 2014–2015. *Antimicrob Agents Chemother* 61,  
339 pii: e01036-17. <https://aac.asm.org/content/61/12/e01036-17>.
- 340 10. Kheang ST, Sovannaroth S, Ek S, Chy S, Chhun P, Mao S, Nguon S, Lek DS,  
341 Menard D, Kak N. 2017. Prevalence of K13 mutation and Day-3 positive  
342 parasitaemia in artemisinin-resistant malaria endemic area of Cambodia: a  
343 cross-sectional study. *Malar J* 16:372.  
344 <https://doi.org/10.1186/s12936-017-2024-4>.
- 345 11. Cook J, Hergott D, Phiri W, Rivas MR, Bradley J, Segura L, Garcia G, Schwabe  
346 C, Kleinschmidt I. 2018. Trends in parasite prevalence following 13 years of  
347 malaria interventions on Bioko island, Equatorial Guinea: 2004–2016. *Malar J*  
348 17:62. <https://doi.org/10.1186/s12936-018-2213-9>.
- 349 12. Kaur H, Allan EL, Mamadu I, Hall Z, Green MD, Swamidoss I, Dwivedi P,  
350 Culzoni MJ, Fernandez FM, Garcia G, Hergott D, Monti F. 2017. Prevalence of  
351 substandard and falsified artemisinin-based combination antimalarial medicines  
352 on Bioko Island, Equatorial Guinea. *BMJ Glob Health* 2:e000409.  
353 <http://dx.doi.org/10.1136/bmjgh-2017-000409>.
- 354 13. Li J, Chen J, Xie D, Eyi UM, Matesa RA, Ondo Obono MM, Ehapo CS, Yang L,  
355 Yang H, Lin M. 2016. Limited artemisinin resistance-associated polymorphisms  
356 in *Plasmodium falciparum* K13-propeller and PfATPase6 gene isolated from

- 357 Bioko Island, Equatorial Guinea. *Int J Parasitol Drugs Drug Resist* 6:54–59.  
358 <https://doi.org/10.1016/j.ijpddr.2015.11.002>.
- 359 14. Chen JT, Li J, Zha GC, Huang G, Huang ZX, Xie DD, Zhou X, Mo HT, Eyi JUM,  
360 Matesa RA, Obono MMO, Li S, Liu XZ, Lin M. 2018. Genetic diversity and  
361 allele frequencies of *Plasmodium falciparum* msp1 and msp2 in parasite isolates  
362 from Bioko Island, Equatorial Guinea. *Malar J* 17:458.  
363 <https://doi.org/10.1186/s12936-018-2611-z>.
- 364 15. Wang SQ, Zhou HY, Li Z, Liu YB, Fu XF, Zhu JJ, Cao J, Gao Q. 2011.  
365 Quantitative detection and species identification of human *Plasmodium spp.* by  
366 using SYBR Green I based real-time PCR. *Zhongguo Xue Xi Chong Bing Fang*  
367 *Zhi Za Zhi* 23:677–681.
- 368 16. Ogutu BR, Onyango KO, Koskei N, Omondi EK, Ongecha JM, Otieno GA,  
369 Obonyo C, Otieno L, Eyase F, Johnson JD, Omollo R, Perkins DJ, Akhwale W,  
370 Juma E. 2014. Efficacy and safety of artemether-lumefantrine and  
371 dihydroartemisinin-piperaquine in the treatment of uncomplicated *Plasmodium*  
372 *falciparum* malaria in Kenyan children aged less than five years: results of an  
373 open-label, randomized, single-centre study. *Malar J* 13:33.  
374 <https://doi.org/10.1186/1475-2875-13-33>.
- 375 17. Ursing J, Rombo L, Rodrigues A, Kofoed PE. 2016. Artemether-Lumefantrine  
376 versus Dihydroartemisinin-Piperaquine for Treatment of Uncomplicated  
377 *Plasmodium falciparum* Malaria in Children Aged Less than 15 Years in  
378 Guinea-Bissau - An Open-Label Non-Inferiority Randomised Clinical Trial. *PLoS*  
379 *One* 11:e0161495. <https://doi.org/10.1371/journal.pone.0161495>.
- 380 18. Sow D, Ndiaye JL, Sylla K, Ba MS, Tine RC, Faye B, Pene M, Ndiaye M, Seck  
381 A, Lo AC, Abiola A, Dieng Y, Gaye O. 2016. Evaluation of the efficacy and  
382 safety of three 2-drug combinations for the treatment of uncomplicated  
383 *Plasmodium falciparum* malaria in Senegal: artesunate-amodiaquine,  
384 dihydroartemisinin-piperaquine, and artemether-lumefantrine. *Med Sante Trop*  
385 26:45–50.
- 386 19. Wanzira H, Kakuru A, Arinaitwe E, Bigira V, Muhindo MK, Conrad M,  
387 Rosenthal PJ, Kanya MR, Tappero JW, Dorsey G. 2014. Longitudinal outcomes  
388 in a cohort of Ugandan children randomized to artemether-lumefantrine versus  
389 dihydroartemisinin-piperaquine for the treatment of malaria. *Clin Infect Dis*  
390 59:509–516. <https://doi.org/10.1093/cid/ciu353>.



- 391 20. Plucinski MM, Talundzic E, Morton L, Dimbu PR, Macaia AP, Fortes F,  
392 Goldman I, Lucchi N, Stennies G, MacArthur JR, Udhayakumar V. 2015.  
393 Efficacy of artemether-lumefantrine and dihydroartemisinin-piperaquine for  
394 treatment of uncomplicated malaria in children in Zaire and Uíge Provinces,  
395 angola. Antimicrob Agents Chemother 59:437–443.  
396 <https://doi.org/10.1093/cid/ciu353>.
- 397 21. Kakolwa MA, Mahende MK, Ishengoma DS, Mandara CI, Ngasala B,  
398 Kamugisha E, Kataraihya JB, Mandike R, Mkude S, Chacky F, Njau R, Premji Z,  
399 Lemnge MM, Warsame M, Menard D, Kabanywanyi AM. 2018. Efficacy and  
400 safety of artemisinin-based combination therapy, and molecular markers for  
401 artemisinin and piperaquine resistance in Mainland Tanzania. Malar J 17:369.  
402 <https://doi.org/10.1186/s12936-018-2524-x>.
- 403 22. Silva M, Ferreira PE, Otienoburu SD, Calçada C, Ngasala B, Björkman A,  
404 Mårtensson A, Gil JP, Veiga MI. 2019. *Plasmodium falciparum* K13 expression  
405 associated with parasite clearance during artemisinin-based combination therapy.  
406 J Antimicrob Chemother pii: dkz098. <https://doi.org/10.1093/jac/dkz098>.
- 407 23. WWARN K13 Genotype-Phenotype Study Group. 2019. Association of  
408 mutations in the *Plasmodium falciparum* Kelch13 gene (Pf3D7\_1343700) with  
409 parasite clearance rates after artemisinin-based treatments—a WWARN individual  
410 patient data meta-analysis. BMC Med 17:1.  
411 <https://doi.org/10.1186/s12916-018-1207-3>.
- 412 24. Baraka V, Tinto H, Valea I, Fitzhenry R, Delgado-Ratto C, Mbonye MK, Van  
413 Overmeir C, Rosanas-Urgell A, Van Geertruyden JP, D'Alessandro U, Erhart A.  
414 2015. *In vivo* selection of *Plasmodium falciparum* Pfert and Pfmdr1 variants by  
415 artemether-lumefantrine and dihydroartemisinin-piperaquine in Burkina Faso.  
416 Antimicrob Agents Chemother 59:734–737. <https://aac.asm.org/content/59/1/734>.
- 417 25. Veiga MI, Dhingra SK, Henrich PP, Straimer J, Gnädig N, Uhlemann AC, Martin  
418 RE, Lehane AM, Fidock DA. 2016. Globally prevalent PfMDR1 mutations  
419 modulate *Plasmodium falciparum* susceptibility to artemisinin-based combination  
420 therapies. Nat Commun 7:11553. <https://www.nature.com/articles/ncomms11553>.
- 421 26. Witkowski B, Duru V, Khim N, Ross LS, Saintpierre B, Beghain J, Chy S, Kim S,  
422 Ke S, Kloeung N, Eam R, Khean C, Ken M, Loch K, Bouillon A, Domergue A,  
423 Ma L, Bouchier C, Leang R, Huy R, Nuel G, Barale JC, Legrand E, Ringwald P,  
424 Fidock DA, Mercereau-Puijalon O, Ariey F, Ménard D. 2017. A surrogate marker

- 425 of piperaquine-resistant *Plasmodium falciparum* malaria: a phenotype-genotype  
426 association study. *Lancet Infect Dis* 17:174–183.  
427 <https://linkinghub.elsevier.com/retrieve/pii/S1473309916304157>.
- 428 27. World Health Organization. 2000. Severe *falciparum* malaria. *Trans R Soc Trop*  
429 *Med Hyg* 94(Suppl 1):S1–S90.
- 430 28. Yao Y, Wu K, Xu M, Yang Y, Zhang Y, Yang W, Shang R, Du W, Tan H, Chen J,  
431 Lin M, Li J. 2018. Surveillance of Genetic Variations Associated with  
432 Antimalarial Resistance of *Plasmodium falciparum* Isolates from Returned  
433 Migrant Workers in Wuhan, Central China. *Antimicrob Agents Chemother* 62, pii:  
434 e02387-17. <https://aac.asm.org/content/62/9/e02387-17>.
- 435 29. Li J, Chen J, Xie D, Eyi UM, Matesa RA, Obono MMO, Ehapo CS, Yang L,  
436 Yang H, Lin M, Wu W, Wu K, Li S, Chen Z. 2015. Molecular mutation profile of  
437 Pfert and Pfmdr1 in *Plasmodium falciparum* isolates from Bioko Island,  
438 Equatorial Guinea. *Infect Genet Evol* 36:552–556.  
439 <https://linkinghub.elsevier.com/retrieve/pii/S1567134815003627>.
- 440

441 **Figure Legends**

442 **FIG 1** Primers and schematic representations of *K13* and *MDR1* nested PCR and  
443 sequencing strategies. New nested PCR and sequencing primers (A) were developed  
444 to capture the 7 MDR1 SNPs (B) and the whole K13 gene (C). The primers in the  
445 table are color-coded to match their positions in the schematics.

**Table 1** Kelch13 and MDR1 polymorphisms of Bioko *P. falciparum* isolates in baseline population and D3-positively with DHA-PIP treatment

| Polymorphisms           | Baseline population, % (n=46) | D3, % (n=19) | Odds ratio (95% CI) | p-value |
|-------------------------|-------------------------------|--------------|---------------------|---------|
| <b><i>K13</i> gene</b>  |                               |              |                     |         |
| H136N(CAT>AAT)          | 2 (4.3)                       | 0 (0.0)      | 0.96 (0.90-1.02)    | 0.356   |
| K189N(AAG>AAC)          | 18 (39.1)                     | 7 (36.8)     | 1.06 (0.35-3.20)    | 0.863   |
| K248N(AAG>AAT)          | 1 (2.2)                       | 0 (0.0)      | 0.98 (0.94-1.02)    | 0.517   |
| K326E(AAA>GAA)          | 1 (2.2)                       | 0 (0.0)      | 0.98 (0.94-1.02)    | 0.517   |
| K332N(AAA>AAC)          | 1 (2.2)                       | 0 (0.0)      | 0.98 (0.94-1.02)    | 0.517   |
| <b><i>MDR1</i> gene</b> |                               |              |                     |         |
| N86Y(AAC>TAT)           | 14 (30.4)                     | 11 (57.9)    | 3.14 (1.04-9.50)    | 0.038*  |
| Y184F(TAT>TTT)          | 31 (67.4)                     | 17 (89.5)    | 4.11 (0.84-21.86)   | 0.065   |

\*Baseline population: patients randomly selected from the 301 patients without ART-resistance, collected at D0; D3: the D3-positively patients after DHA-PIP treatment.

A.

|  | PCR or Sequencing Assay | Primer Sequence(5'-3')          | Product | The Target Site                                   |
|--|-------------------------|---------------------------------|---------|---------------------------------------------------|
|  | Pf MDR1(1)-N1F          | TTAAATGTTTACCTGCACAACATAGAAAATT | 612bp   | N86Y、E130K、Y184F                                  |
|  | Pf MDR1(1)-N1R          | CTCCACAATAAAGTTCGCAACAGTTCTTA   |         |                                                   |
|  | Pf MDR1(1)-N2F          | TGTATGTGCTGTATTATCAGGA          | 526bp   |                                                   |
|  | Pf MDR1(1)-N2R          | CTCTTCTATAATGGACATGGTA          |         |                                                   |
|  | Pf MDR1(2)-N1F          | AATTTGATAGAAAAAGCTATTGATTATAA   | 880bp   | S1034C、N1042D、<br>V1109I、D1246Y                   |
|  | Pf MDR1(2)-N1R          | TATTTGGTAATGATTTCGATAAATTCATC   |         |                                                   |
|  | Pf MDR1(2)-N2F          | GAATTATTGTAAATGCAGCTTTA         | 799bp   |                                                   |
|  | Pf MDR1(2)-N2R          | GCAGCAAAGTACTAACACG             |         |                                                   |
|  | Pf K13-PCR-F            | CGGAGTGACCAAATCTGGGA            | 2097bp  | F446I、N458Y、Y493H、<br>R539T、I543T、R561H、<br>C580Y |
|  | Pf K13-PCR-R            | GGGAATCTGGTGGTAACAGC            |         |                                                   |
|  | Pf K13-PCR-N1-F         | GCCAAGCTGCCATTCATTTG            | 2027bp  |                                                   |
|  | Pf K13-PCR-N2-R         | GCGGAAGTAGTAGCGAGAAT            |         |                                                   |

B.

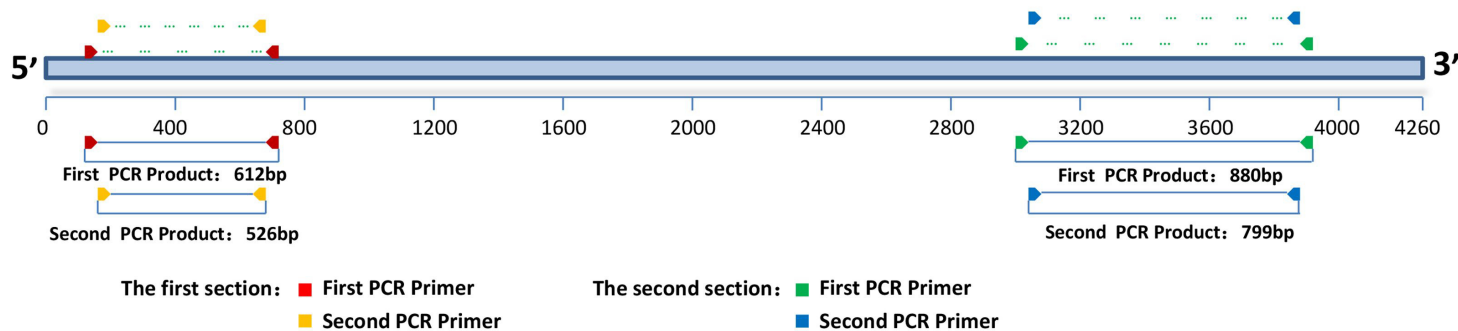

C.

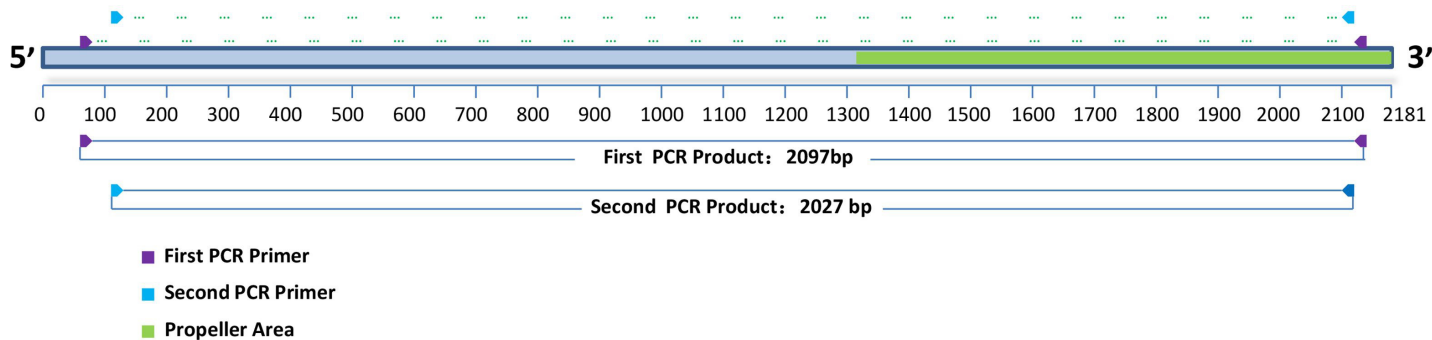

Source: https://www.biorxiv.org/content/10.1101/594366v1.full.pdf
